# Supplementary material for: Biogenic Synthesis of Copper Nanoparticles Using Bacterial Strains Isolated from an Antarctic Consortium Associated to a Psychrophilic Marine Ciliate: Characterization and Potential Application as Antimicrobial Agents
Source: MDPI journal article supplement (doi:10.3390/md19050263), 2021-05-08
Supplement: s1 [file s1]

# Biogenic Synthesis of Copper Nanoparticles Using Bacterial Strains Isolated from an Antarctic Consortium Associated to a Psychrophilic Marine Ciliate: Characterization and Potential Application as Antimicrobial Agents

Maria Sindhura John <sup>1</sup>, Joseph Amruthraj Nagoth <sup>1</sup>, Marco Zannotti <sup>2,\*</sup>, Rita Giovannetti <sup>2</sup>, Alessio Mancini <sup>1</sup>, Kesava Priyan Ramasamy <sup>1</sup>, Cristina Miceli <sup>1</sup> and Sandra Pucciarelli <sup>1,\*</sup>

## Supplementary figures

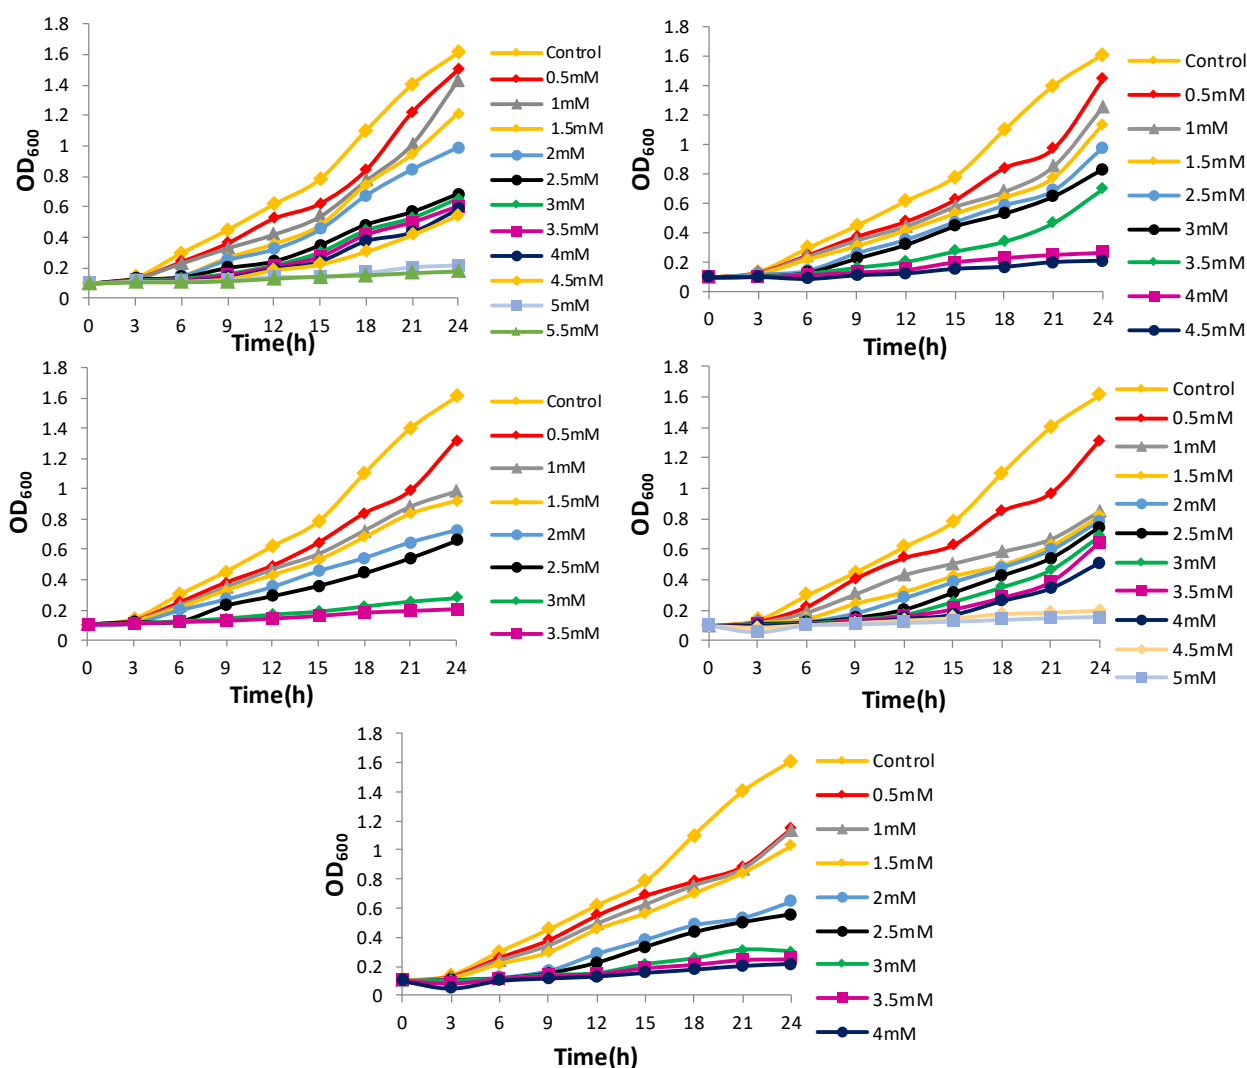

Figure S1. Bacterial growth in the presence of increasing concentration of CuSO<sub>4</sub>.

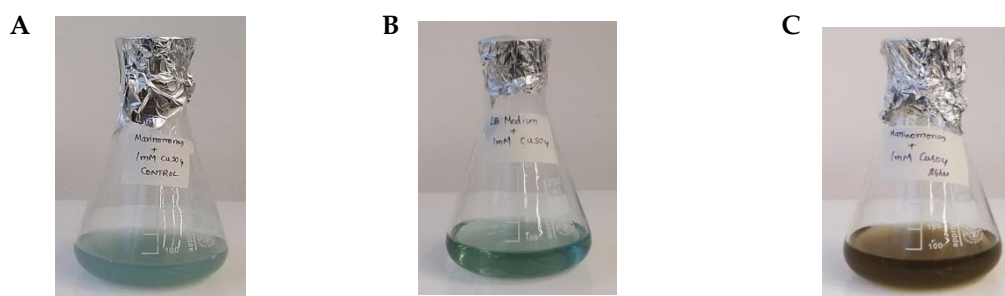

*Marinomonas ef1*

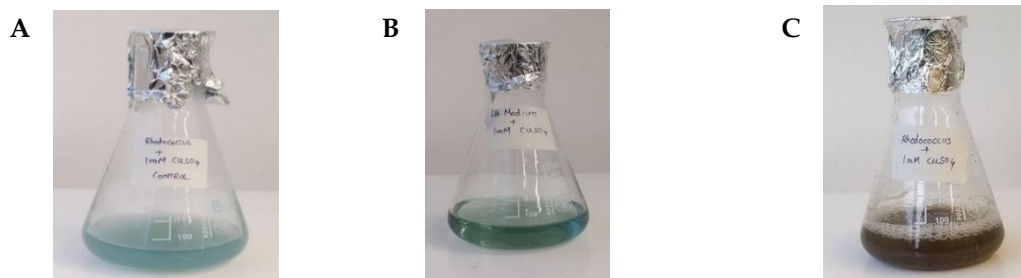

*Rhodococcus ef1*

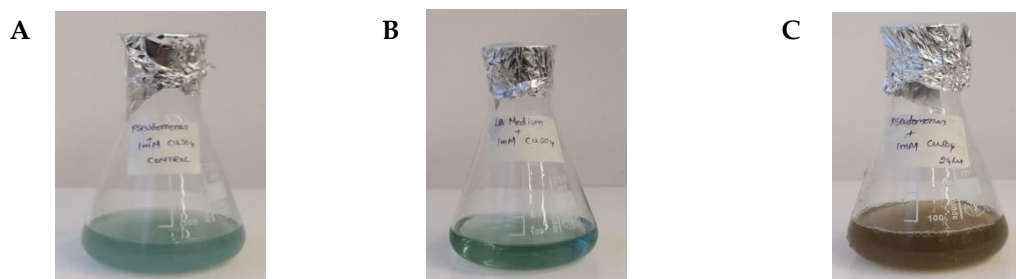

*Pseudomonas ef1*

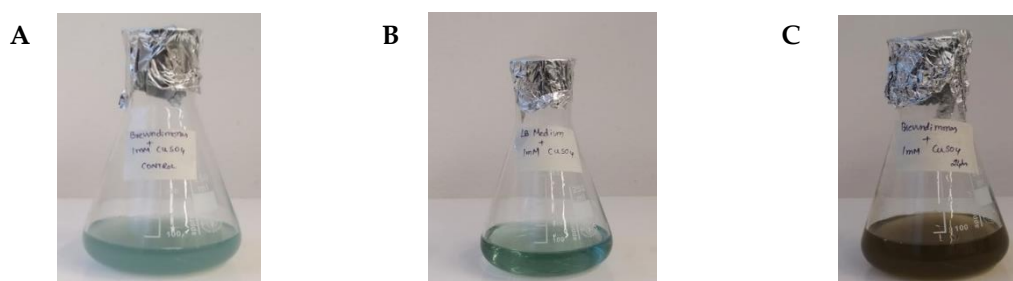

*Brevundimonas ef1*

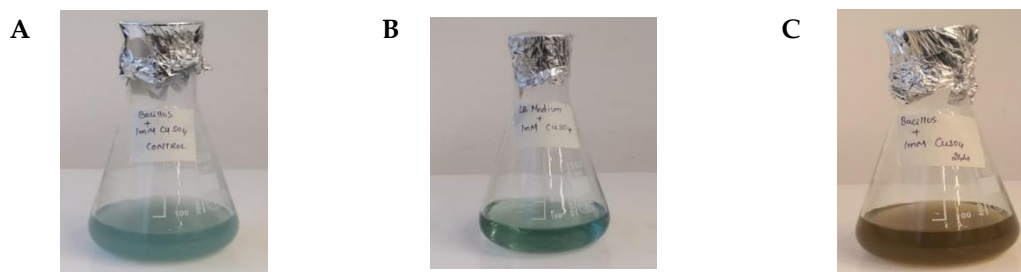

*Bacillus ef1*

**Figure. S2.** Biosynthesis of Cu NPs from *Marinomonas ef1*, *Rhodococcus ef1*, *Pseudomonas ef1*, *Brevundimonas ef1* and *Bacillus ef1*. **A.** Control with heat killed bacterial culture with 1mM CuSO<sub>4</sub>; **B.** Control with LB medium with 1mM CuSO<sub>4</sub>; **C.** Biosynthesized Cu NPs.

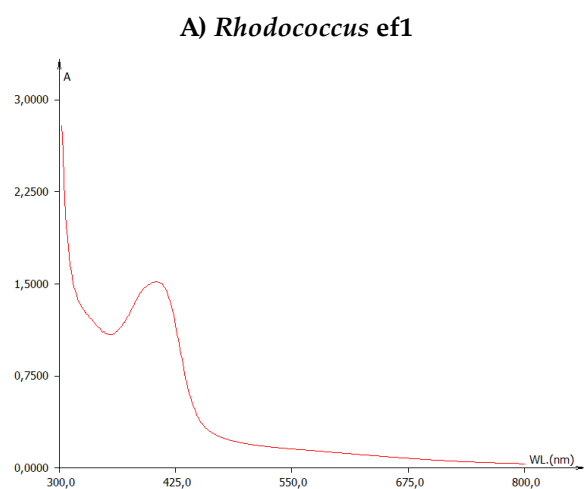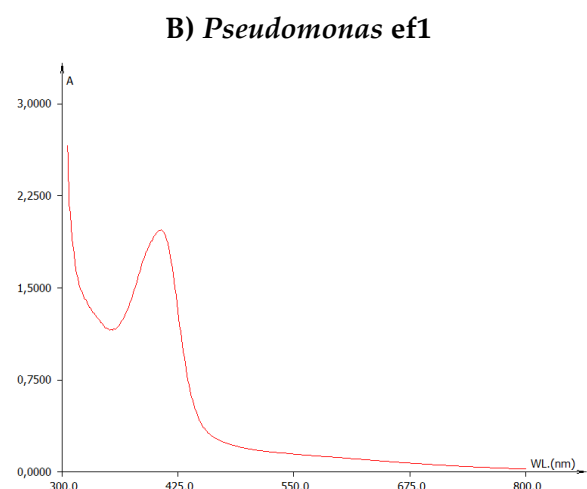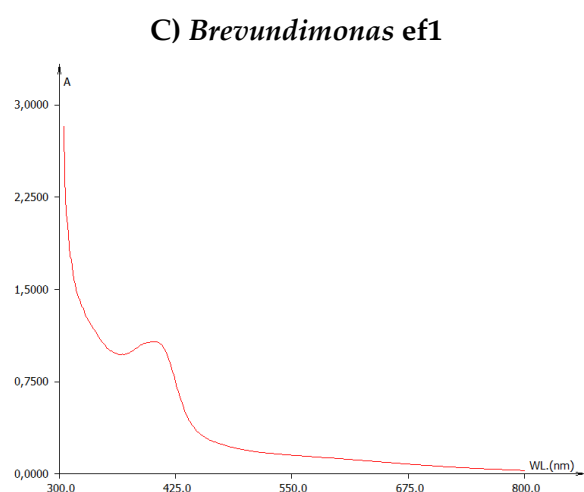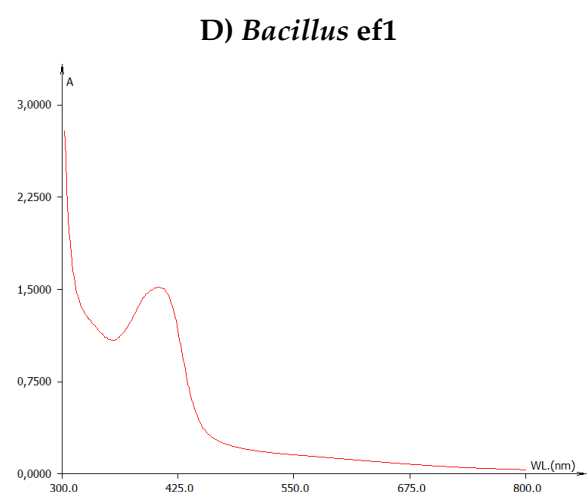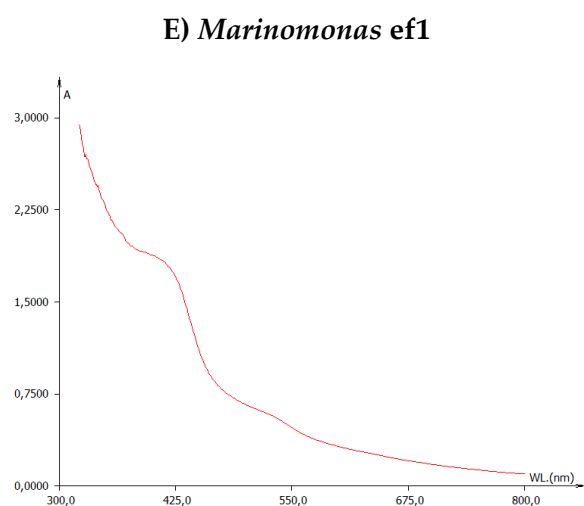

**Figure S3.** UV-Vis absorbance spectra of bio- CuO NPs synthesized from (A) *Rhodococcus* ef1, (B) *Pseudomonas* ef1, (C) *Brevundimonas* ef1; (D) *Bacillus* ef1; (E) *Marinomonas* ef1.

IR spectra. All the samples showed similar IR spectra with comparable vibration peaks. In the IR spectra a broad intense absorption band in the region between 3600 and 2800  $\text{cm}^{-1}$  can be attributed to  $\text{-OH}$  stretching, the peak at around 3245  $\text{cm}^{-1}$  can be attributed to  $\text{-NH}$  of amide. The band at around 3065  $\text{cm}^{-1}$  represents the  $\text{=C-H}$  stretch of aromatic and unsaturated hydrocarbons; on the other hand the band at around 2960  $\text{cm}^{-1}$  is due to the  $\text{C-H}$  stretching of the aliphatic portion of the molecule around nanoparticles. In the range between 2100 to 1800  $\text{cm}^{-1}$  the bands can be assigned to the aromatic portion inside the biomolecules. At around 1620–1650 it is possible to observe the carbonyl group  $\text{C=O}$  of amide and also in this region can be possible the observe the bending of the unsaturated  $\text{C=C}$  bending; in addition, the band at around 1550  $\text{cm}^{-1}$  is representative of the  $\text{N-H}$  bending of the secondary amide. The peak at around 1440–1455  $\text{cm}^{-1}$  indicates the bending of the aliphatic  $\text{-C-H}$  and  $\text{-CH}_3$ . The band at around 1390  $\text{cm}^{-1}$  can be attributed to the  $\text{-OH}$  bending. The peak at around 1240  $\text{cm}^{-1}$  can be assigned to  $\text{C-N}$  stretching vibration of amide, and the peak at around 1100  $\text{cm}^{-1}$  to the  $\text{C-O}$  stretching of alcohol. The broad adsorption at around 900–800  $\text{cm}^{-1}$  can be due to the rocking vibration out of plane of  $\text{-NH}$  portion of the amide.

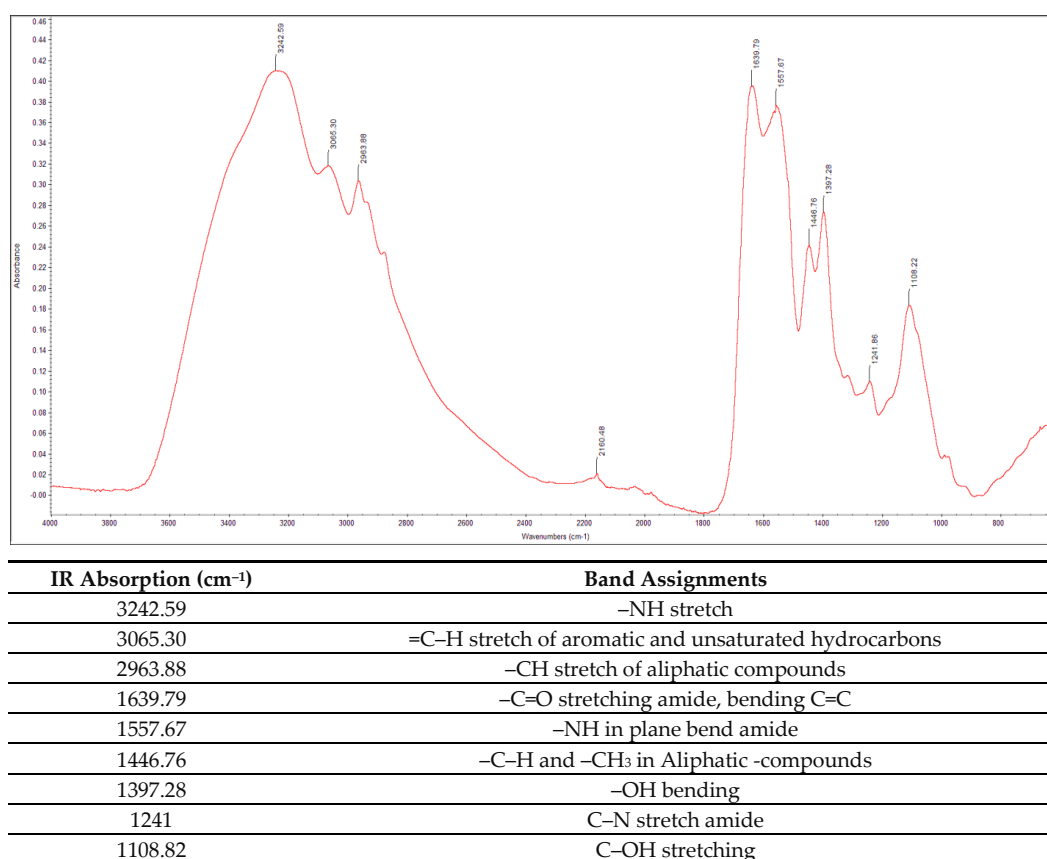

**Figure S4.** FTIR spectrum of biosynthesized CuO NPs from *Marinomonas ef1* and IR assignments.

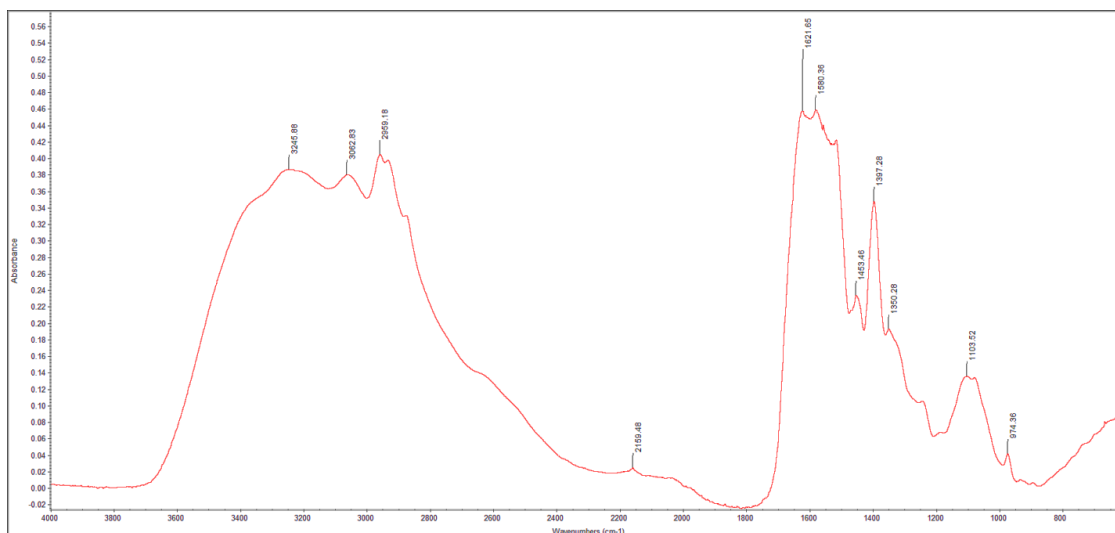

| IR Absorption (cm <sup>-1</sup> ) | Band Assignments                                      |
|-----------------------------------|-------------------------------------------------------|
| 3245.88                           | -NH stretch                                           |
| 3062.83                           | =C-H stretch of aromatic and unsaturated hydrocarbons |
| 2959.18                           | -CH stretch of aliphatic compounds                    |
| 1621.65                           | -C=O stretching amide, bending C=C                    |
| 1580.36                           | -NH in plane bend amide                               |
| 1453.46                           | -C-H and -CH <sub>3</sub> in Aliphatic -compounds     |
| 1397.28                           | -OH bending                                           |
| 1240                              | C-N stretch amide                                     |
| 1103.52                           | C-OH stretching                                       |

**Figure S5.** FTIR spectrum of biosynthesized CuO NPs from *Rhodococcus ef1* and IR assignments.

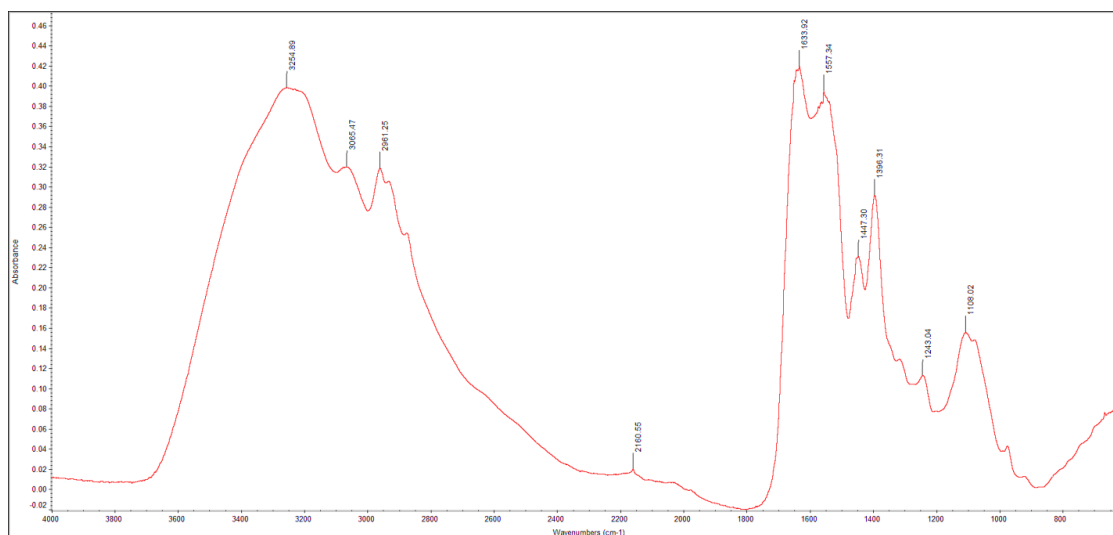

| IR Absorption (cm <sup>-1</sup> ) | Band Assignments                                      |
|-----------------------------------|-------------------------------------------------------|
| 3254.89                           | -NH stretch                                           |
| 3065.47                           | =C-H stretch of aromatic and unsaturated hydrocarbons |
| 2961.25                           | -CH stretch of aliphatic compounds                    |
| 1633.92                           | -C=O stretching amide, bending C=C                    |
| 1557.34                           | -NH in plane bend amide                               |
| 1447.30                           | -C-H and -CH <sub>3</sub> in Aliphatic -compounds     |
| 1396.31                           | -OH bending                                           |
| 1243.04                           | C-N stretch amide                                     |
| 1108.02                           | C-OH stretching                                       |

**Figure S6.** FTIR spectrum of biosynthesized CuO NPs from *Pseudomonas ef1* and IR assignments.

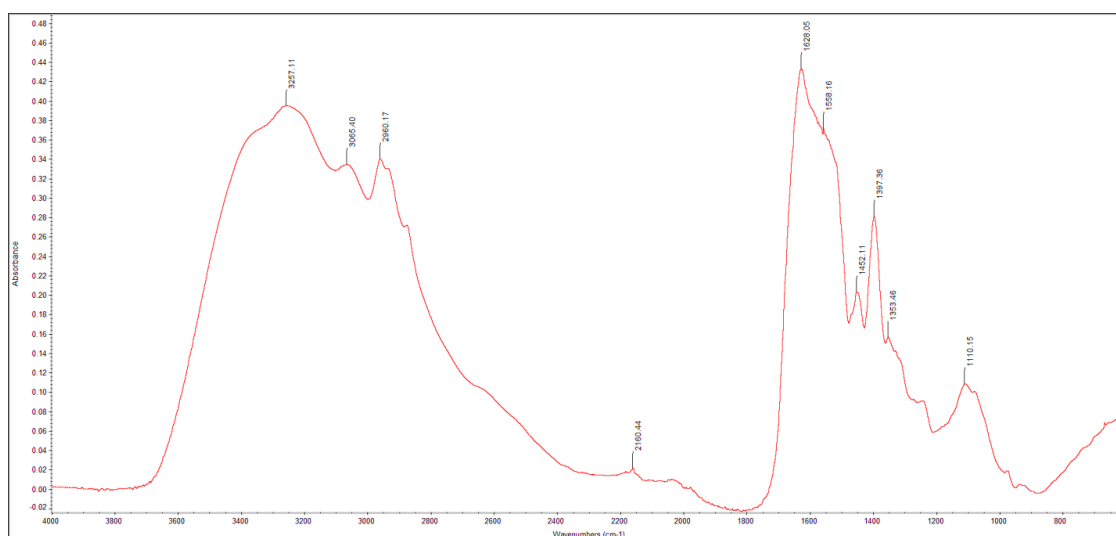

| IR Absorption (cm <sup>-1</sup> ) | Band Assignments                                      |
|-----------------------------------|-------------------------------------------------------|
| 3257.11                           | -NH stretch                                           |
| 3065.40                           | =C-H stretch of aromatic and unsaturated hydrocarbons |
| 2960.70                           | -CH stretch of aliphatic compounds                    |
| 1628.01                           | -C=O stretching amide, bending C=C                    |
| 1558.16                           | -NH in plane bend amide                               |
| 1452.11                           | -C-H and -CH <sub>3</sub> in Aliphatic -compounds     |
| 1397.36                           | -OH bending                                           |
| 1240.21                           | C-N stretch amide                                     |
| 1110.15                           | C-OH stretching                                       |

**Figure S7.** FTIR spectrum of biosynthesized CuONPs from *Brevundimonas* ef1 and IR assignments.

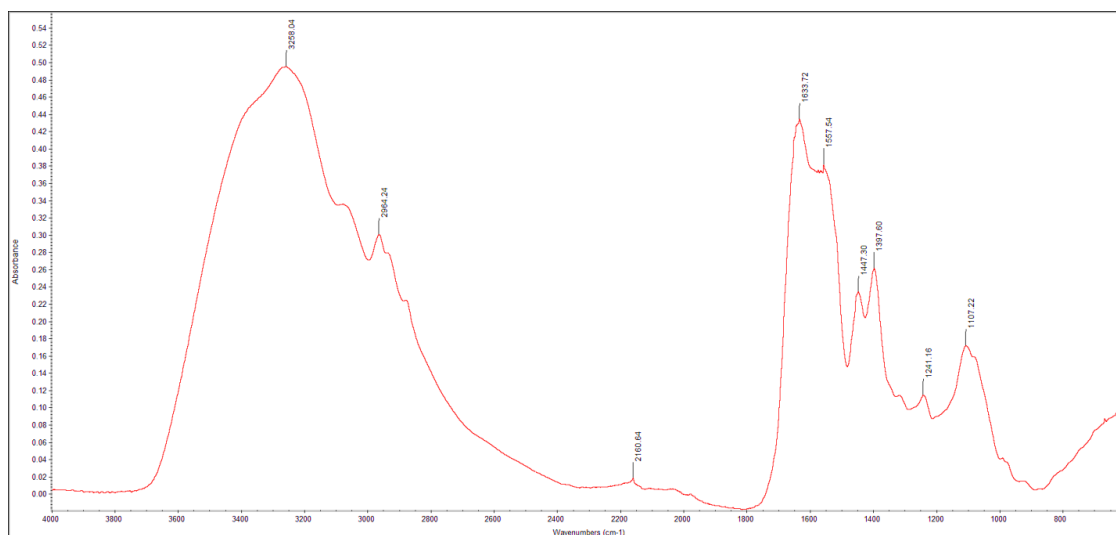

| IR Absorption (cm <sup>-1</sup> ) | Band Assignments                                      |
|-----------------------------------|-------------------------------------------------------|
| 3258.04                           | -NH stretch                                           |
| 3064.25                           | =C-H stretch of aromatic and unsaturated hydrocarbons |
| 2964.24                           | -CH stretch of aliphatic compounds                    |
| 1633.72                           | -C=O stretching amide, bending C=C                    |
| 1557.54                           | -NH in plane bend amide                               |
| 1447.30                           | -C-H and -CH <sub>3</sub> in Aliphatic -compounds     |
| 1397.60                           | -OH bending                                           |
| 1241.16                           | C-OH stretching                                       |

**Figure S8.** FTIR spectrum of biosynthesized CuO NPs from *Bacillus* ef1 and IR assignments.

**Figure S9. MIC values of *Marinomonas* CuO NPs.** Among Gram-negative bacteria *Proteus mirabilis* showed the lowest MIC of 3.12  $\mu\text{g/mL}$  whereas *Pseudomonas* sp., *Citrobacter koseri* and *Serratia marcescens* showed a MIC of 6.25  $\mu\text{g/mL}$ . While *Escherichia coli*, *Klebsiella pneumoniae* and *Acinetobacter baumannii* showed a MIC value of 12.5  $\mu\text{g/mL}$ . In gram positive bacteria *Staphylococcus aureus* showed 12.5  $\mu\text{g/mL}$ . Among fungi the lowest MIC value was in *Candida parapsilosis* (12.5  $\mu\text{g/mL}$ ), while *Candida albicans* showed a MIC of 25  $\mu\text{g/mL}$ . The lowest MBC among gram negative bacteria was showed by *Proteus mirabilis* and *Citrobacter koseri* is 6.25  $\mu\text{g/mL}$ . *Pseudomonas* sp., *Acinetobacter baumannii* and *Serratia marcescens* showed a MBC of 12.5  $\mu\text{g/mL}$ . Among gram positive bacteria *Staphylococcus aureus* showed a MBC of 25  $\mu\text{g/mL}$ . Among Fungi *Candida albicans* and *Candida parapsilosis* showed MBC value of 25  $\mu\text{g/mL}$ .

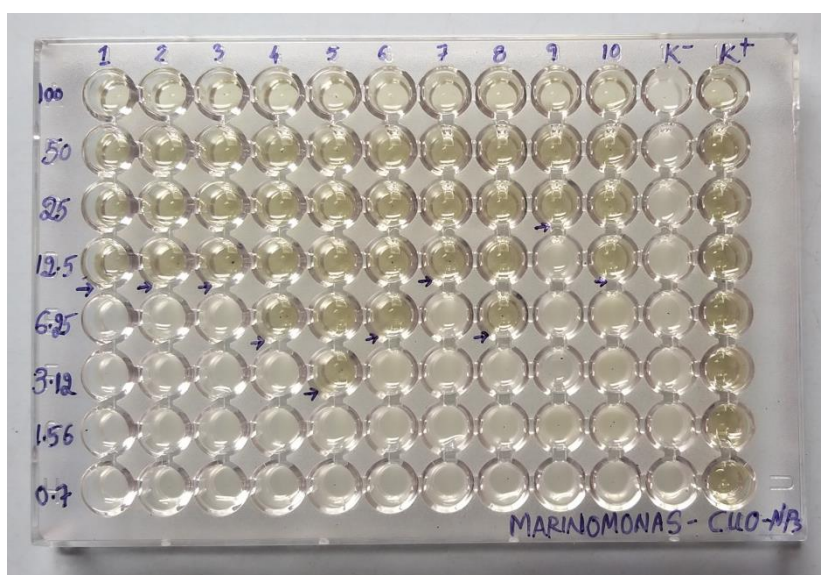

*Marinomonas* ef1 CuO NPs Broth microdilution method. 1. *Staphylococcus aureus* 2. *Escherichia coli* 3. *Klebsiella pneumoniae* 4. *Pseudomonas* sp. 5. *Proteus mirabilis* 6. *Citrobacter koseri* 7. *Acinetobacter baumannii* 8. *Serratia marcescens* 9. *Candida albicans* 10. *Candida parapsilosis*.



**Figure S10. MIC values of *Rhodococcus ef1* CuO NPs.** Among Gram-negative bacteria *Serratia marcescens* showed the lowest MIC (3.12  $\mu\text{g/mL}$ ) whereas *Klebsiella pneumoniae* and *Proteus mirabilis* showed a MIC of 6.25  $\mu\text{g/mL}$ . *Escherichia coli*, *Pseudomonas sp.*, *Citrobacter koseri* and *Acinetobacter baumannii* showed a MIC value of 12.5  $\mu\text{g/mL}$ . In gram-positive bacteria, *Staphylococcus aureus* showed a MIC of 12.5  $\mu\text{g/mL}$ . The lowest MIC in fungi was in *Candida albicans* (12.5  $\mu\text{g/mL}$ ). *Candida parapsilosis* showed a MIC of 25  $\mu\text{g/mL}$ . The lowest MBC among gram-negative bacteria was showed by *Klebsiella pneumoniae*, *Proteus mirabilis*, *Citrobacter koseri*, *Acinetobacter baumannii* and *Serratia marcescens* (12.5  $\mu\text{g/mL}$ ). *Escherichia coli* and *Pseudomonas sp.* showed a MBC of 25  $\mu\text{g/mL}$ . Among gram-positive bacteria *Staphylococcus aureus* showed a MBC of 25  $\mu\text{g/mL}$ . *Candida albicans* and *Candida parapsilosis* also showed a MBC of 25  $\mu\text{g/mL}$ .

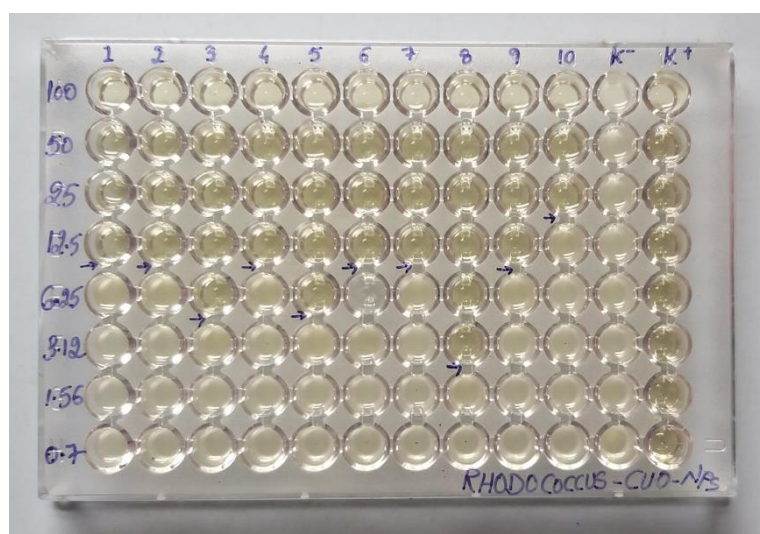

*Rhodococcus ef1* CuO NPs Broth microdilution method. 1. *Staphylococcus aureus* 2. *Escherichia coli* 3. *Klebsiella pneumoniae* 4. *Pseudomonas sp.* 5. *Proteus mirabilis* 6. *Citrobacter koseri* 7. *Acinetobacter baumannii* 8. *Serratia marcescens* 9. *Candida albicans* 10. *Candida parapsilosis*.



**Figure S11. MIC values of *Brevundimonas* ef1 CuO NPs.** *Proteus mirabilis* and *Serratia marcescens* showed the lowest MIC (6.25 µg/mL), whereas *Klebsiella pneumoniae*, *Pseudomonas* sp., *Citrobacter koseri* and *Acinetobacter baumannii* showed a MIC value of 12.5 µg/mL. *Escherichia coli* showed a MIC value of 25 µg/mL. In gram-positive bacteria, *Staphylococcus aureus* showed a MIC value of 25 µg/mL. Among fungi, *Candida albicans* and *Candida parapsilosis* showed a MIC value of 12.5 µg/mL. The lowest MBC value among gram negative bacteria was by *Proteus mirabilis* and *Serratia marcescens* (12.5 µg/mL). *Escherichia coli*, *Klebsiella pneumoniae*, *Pseudomonas* sp., *Citrobacter koseri* and *Acinetobacter baumannii* showed a MBC value of 25 µg/mL. Among gram positive bacteria *Staphylococcus aureus* showed a MBC of 25 µg/mL. *Candida albicans* and *Candida parapsilosis* showed a MBC value of 25 µg/mL.

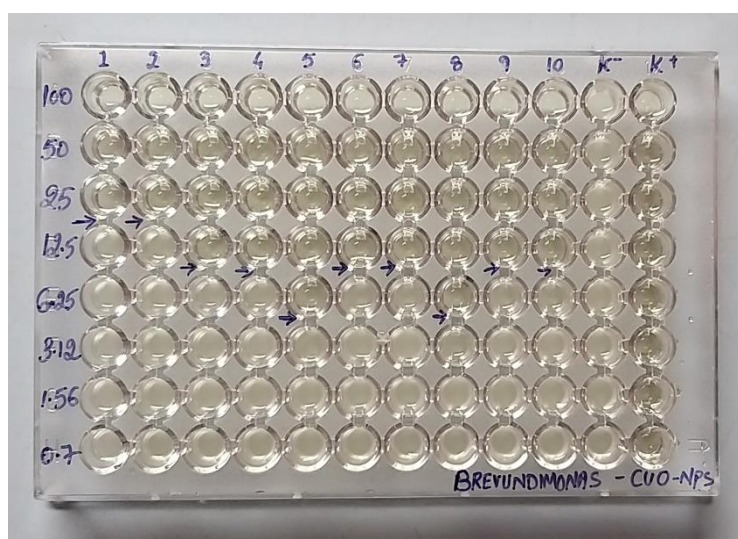

*Brevundimonas* ef1 CuO NPs Broth microdilution method. 1. *Staphylococcus aureus* 2. *Escherichia coli* 3. *Klebsiella pneumoniae* 4. *Pseudomonas* sp. 5. *Proteus mirabilis* 6. *Citrobacter koseri* 7. *Acinetobacter baumannii* 8. *Serratia marcescens* 9. *Candida albicans* 10. *Candida parapsilosis*.

**Figure S12. MIC values of *Pseudomonas* ef1 CuO NPs.** *Proteus mirabilis*, *Citrobacter koseri* and *Serratia marcescens* showed the lowest MIC (6.25 µg/mL). *Klebsiella pneumoniae*, *Pseudomonas* sp., and *Acinetobacter baumannii* showed a MIC value of 12.5 µg/mL. *Escherichia coli* showed a MIC value of 25 µg/mL. In gram positive bacteria *Staphylococcus aureus* showed a MIC value of 12.5 µg/mL. Among fungi *Candida albicans* and *Candida parapsilosis* showed MIC value of 25 µg/mL and 12.5 µg/mL respectively. The Lowest MBC was in *Pseudomonas* sp., *Proteus mirabilis*, *Citrobacter koseri*, *Acinetobacter baumannii* and *Serratia marcescens* (12.5 µg/mL). *Escherichia coli* and *Klebsiella pneumoniae* showed a MBC value of 25 µg/mL. Among gram positive bacteria *Staphylococcus aureus* showed a MBC of 25 µg/mL. *Candida albicans* and *Candida parapsilosis* showed a MBC value of 25 µg/mL.

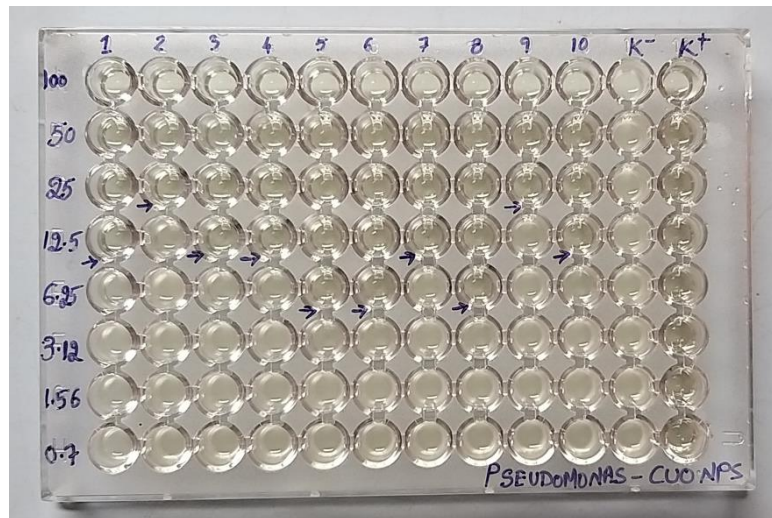

*Pseudomonas* ef1 CuO NPs Broth microdilution method. 1. *Staphylococcus aureus* 2. *Escherichia coli* 3. *Klebsiella pneumoniae* 4. *Pseudomonas* sp. 5. *Proteus mirabilis* 6. *Citrobacter koseri* 7. *Acinetobacter baumannii* 8. *Serratia marcescens* 9. *Candida albicans* 10. *Candida parapsilosis*.

**Figure S13. MIC values of *Bacillus ef1* CuO NPs.** *Klebsiella pneumoniae*, *Proteus mirabilis* and *Serratia marcescens* showed the lowest MIC (6.25 µg/mL), whereas *Escherichia coli*, *Pseudomonas sp.*, *Citrobacter koseri* and *Acinetobacter baumannii* showed a MIC of 12.5 µg/mL. *Escherichia coli* showed a MIC of 25 µg/mL. In gram positive bacteria *Staphylococcus aureus* showed a MIC value of 12.5 µg/mL. Among fungi *Candida albicans* and *Candida parapsilosis* showed a MIC of 12.5 µg/mL and 6.25 µg/mL respectively. The lowest MBC value among gram-negative bacteria was in *Klebsiella pneumoniae* (6.25 µg/mL). *Escherichia coli*, *Pseudomonas sp.*, *Proteus mirabilis*, *Citrobacter koseri*, *Acinetobacter baumannii* and *Serratia marcescens* showed a MBC of 12.5 µg/mL. Among gram positive bacteria *Staphylococcus aureus* showed a MBC of 12.5 µg/mL. Among Fungi *Candida albicans* and *Candida parapsilosis* showed MBC of 25 µg/mL and 12.5 µg/mL respectively.

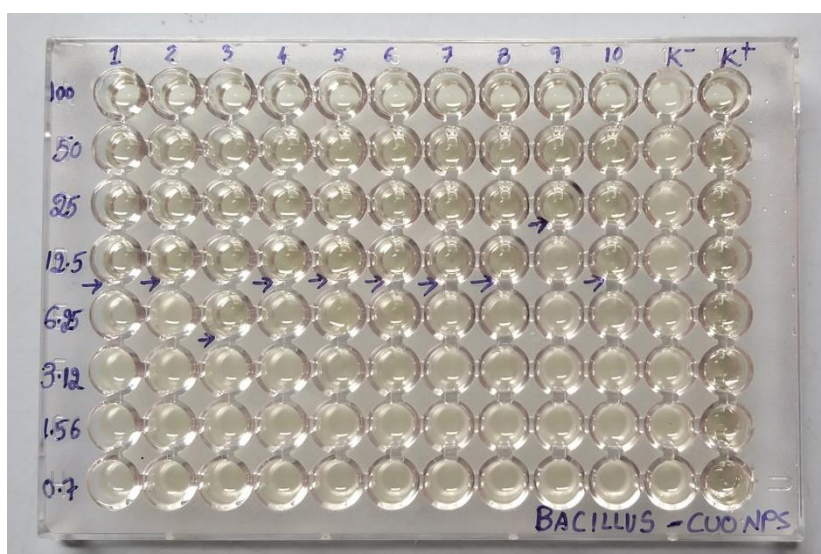

*Bacillus ef1* CuO NPs Broth microdilution method .1. *Staphylococcus aureus* 2. *Escherichia coli* 3. *Klebsiella pneumoniae* 4. *Pseudomonas sp.* 5. *Proteus mirabilis* 6. *Citrobacter koseri* 7. *Acinetobacter baumannii* 8. *Serratia marcescens* 9. *Candida albicans* 10. *Candida parapsilosis*.
